# Supplementary material
Source: Springer Nature journal article supplement (https://www.springermedizin.de/resource/supplementary/13034_2013_239_MOESM1_ESM.pdf/9652594)
Supplement: MOESM1 [file 9652594]

**Area-level – two basic components of Identity Diffusion**

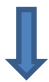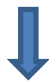

Subdomain level –  
psychosocial functioning

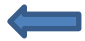

Scale 1:  
Identity-Continuity vs.  
**Discontinuity**  
Ego-Stability, intuitive-emotional  
„I“ („Changing while staying the  
same“)

Scale 2:  
Identity-Coherence vs.  
**Incoherence**  
Ego-Strength, defined „ME“  
(„non-fragmented self with  
clear boundaries“)

Subscale 1.1: **Stability in  
attributes** / talents / goals /  
values vs. lack of perspective

Subscale 2.1: **Consistent self  
image** vs. Contradictions and  
painful ambivalence

**sublevel: self-related**  
intrapersonal  
„Me and I“

Subscale 1.2: **Stability in  
relationships** / roles (family,  
ethnic, gender, body-self) / vs.  
lack of affiliation

Subscale 2.2: **Autonomy** /  
ego-strength vs. over-  
identification, suggestibility,  
lack of self-regulation

**sublevel: social-related**  
interpersonal  
„Me and You“

Subscale 1.3: functional  
**emotional self-reflection** vs.  
distrust in validity and stability of  
emotions

Subscale 2.3: functional  
**cognitive self-reflection** vs.  
superficial or diffuse  
representations

**sublevel: ability-related**  
**mental representations**  
accessability and complexity  
concerning emotions/motives
